# Supplementary material for: Antibacterial Effects of Essential Oils of Seven Medicinal-Aromatic Plants Against the Fish Pathogen Aeromonas veronii bv. sobria: To Blend or Not to Blend?
Source: MDPI journal article supplement (doi:10.3390/molecules26092731), 2021-05-06
Supplement: s1 [file s1]

**Supplementary material Table S2.** Percentage of essential oils (EOs) of seven Greek native medicinal-aromatic plants (MAPs) in various preparations used for growth-inhibitory and bactericidal activity testing against the fish pathogen *Aeromonas veronii* bv. *sobria*. GO: Greek oregano, S: Savoury, R: Rosemary, WC: Wild carrot, SO: Spanish oregano, P: Pennyroyal, L: Lemon balm.

| EOs of MAPs used | Preparation | GO     | S      | R      | WC     | SO     | P      | L      |
|------------------|-------------|--------|--------|--------|--------|--------|--------|--------|
| 1                | 1           | 100.00 | -      | -      | -      | -      | -      | -      |
|                  | 2           | -      | 100.00 | -      | -      | -      | -      | -      |
|                  | 3           | -      | -      | 100.00 | -      | -      | -      | -      |
|                  | 4           | -      | -      | -      | 100.00 | -      | -      | -      |
|                  | 5           | -      | -      | -      | -      | 100.00 | -      | -      |
|                  | 6           | -      | -      | -      | -      | -      | 100.00 | -      |
|                  | 7           | -      | -      | -      | -      | -      | -      | 100.00 |
| 2                | 8           | 50.00  | 50.00  | -      | -      | -      | -      | -      |
|                  | 9           | 50.00  | -      | 50.00  | -      | -      | -      | -      |
|                  | 10          | 50.00  | -      | -      | 50.00  | -      | -      | -      |
|                  | 11          | 50.00  | -      | -      | -      | 50.00  | -      | -      |
|                  | 12          | 50.00  | -      | -      | -      | -      | 50.00  | -      |
|                  | 13          | 50.00  | -      | -      | -      | -      | -      | 50.00  |
|                  | 14          | -      | 50.00  | 50.00  | -      | -      | -      | -      |
|                  | 15          | -      | 50.00  | -      | 50.00  | -      | -      | -      |
|                  | 16          | -      | 50.00  | -      | -      | 50.00  | -      | -      |
|                  | 17          | -      | 50.00  | -      | -      | -      | 50.00  | -      |
|                  | 18          | -      | 50.00  | -      | -      | -      | -      | 50.00  |
|                  | 19          | -      | -      | 50.00  | 50.00  | -      | -      | -      |
|                  | 20          | -      | -      | 50.00  | -      | 50.00  | -      | -      |
|                  | 21          | -      | -      | 50.00  | -      | -      | 50.00  | -      |
|                  | 22          | -      | -      | 50.00  | -      | -      | -      | 50.00  |
|                  | 23          | -      | -      | -      | 50.00  | 50.00  | -      | -      |
|                  | 24          | -      | -      | -      | 50.00  | -      | 50.00  | -      |
|                  | 25          | -      | -      | -      | 50.00  | -      | -      | 50.00  |
|                  | 26          | -      | -      | -      | -      | 50.00  | 50.00  | -      |
|                  | 27          | -      | -      | -      | -      | 50.00  | -      | 50.00  |
|                  | 28          | -      | -      | -      | -      | -      | 50.00  | 50.00  |
| 3                | 29          | 33.33  | 33.33  | 33.33  | -      | -      | -      | -      |
|                  | 30          | 33.33  | 33.33  | -      | 33.33  | -      | -      | -      |
|                  | 31          | 33.33  | 33.33  | -      | -      | 33.33  | -      | -      |
|                  | 32          | 33.33  | 33.33  | -      | -      | -      | 33.33  | -      |
|                  | 33          | 33.33  | 33.33  | -      | -      | -      | -      | 33.33  |
|                  | 34          | 33.33  | -      | 33.33  | 33.33  | -      | -      | -      |
|                  | 35          | 33.33  | -      | 33.33  | -      | 33.33  | -      | -      |
|                  | 36          | 33.33  | -      | 33.33  | -      | -      | 33.33  | -      |

| EOs of MAPs<br>used | Preparation | GO    | S     | R     | WC    | SO    | P     | L     |
|---------------------|-------------|-------|-------|-------|-------|-------|-------|-------|
|                     | 37          | 33.33 | -     | 33.33 | -     | -     | -     | 33.33 |
|                     | 38          | 33.33 | -     | -     | 33.33 | 33.33 | -     | -     |
|                     | 39          | 33.33 | -     | -     | 33.33 | -     | 33.33 | -     |
|                     | 40          | 33.33 | -     | -     | 33.33 | -     | -     | 33.33 |
|                     | 41          | 33.33 | -     | -     | -     | 33.33 | 33.33 | -     |
|                     | 42          | 33.33 | -     | -     | -     | 33.33 | -     | 33.33 |
|                     | 43          | 33.33 | -     | -     | -     | -     | 33.33 | 33.33 |
|                     | 44          | -     | 33.33 | 33.33 | 33.33 | -     | -     | -     |
|                     | 45          | -     | 33.33 | 33.33 | -     | 33.33 | -     | -     |
|                     | 46          | -     | 33.33 | 33.33 | -     | -     | 33.33 | -     |
|                     | 47          | -     | 33.33 | 33.33 | -     | -     | -     | 33.33 |
|                     | 48          | -     | 33.33 | -     | 33.33 | 33.33 | -     | -     |
|                     | 49          | -     | 33.33 | -     | 33.33 | -     | 33.33 | -     |
|                     | 50          | -     | 33.33 | -     | 33.33 | -     | -     | 33.33 |
|                     | 51          | -     | 33.33 | -     | -     | 33.33 | 33.33 | -     |
|                     | 52          | -     | 33.33 | -     | -     | 33.33 | -     | 33.33 |
|                     | 53          | -     | 33.33 | -     | -     | -     | 33.33 | 33.33 |
|                     | 54          | -     | -     | 33.33 | 33.33 | 33.33 | -     | -     |
|                     | 55          | -     | -     | 33.33 | 33.33 | -     | 33.33 | -     |
|                     | 56          | -     | -     | 33.33 | 33.33 | -     | -     | 33.33 |
|                     | 57          | -     | -     | 33.33 | -     | 33.33 | 33.33 | -     |
|                     | 58          | -     | -     | 33.33 | -     | 33.33 | -     | 33.33 |
|                     | 59          | -     | -     | 33.33 | -     | -     | 33.33 | 33.33 |
|                     | 60          | -     | -     | -     | 33.33 | 33.33 | 33.33 | -     |
|                     | 61          | -     | -     | -     | 33.33 | 33.33 | -     | 33.33 |
|                     | 62          | -     | -     | -     | 33.33 | -     | 33.33 | 33.33 |
|                     | 63          | -     | -     | -     | -     | 33.33 | 33.33 | 33.33 |
| 4                   | 64          | 25.00 | 25.00 | 25.00 | 25.00 | -     | -     | -     |
|                     | 65          | 25.00 | 25.00 | 25.00 | -     | 25.00 | -     | -     |
|                     | 66          | 25.00 | 25.00 | 25.00 | -     | -     | 25.00 | -     |
|                     | 67          | 25.00 | 25.00 | 25.00 | -     | -     | -     | 25.00 |
|                     | 68          | 25.00 | 25.00 | -     | 25.00 | 25.00 | -     | -     |
|                     | 69          | 25.00 | 25.00 | -     | 25.00 | -     | 25.00 | -     |
|                     | 70          | 25.00 | 25.00 | -     | 25.00 | -     | -     | 25.00 |
|                     | 71          | 25.00 | 25.00 | -     | -     | 25.00 | 25.00 | -     |
|                     | 72          | 25.00 | 25.00 | -     | -     | 25.00 | -     | 25.00 |
|                     | 73          | 25.00 | 25.00 | -     | -     | -     | 25.00 | 25.00 |
|                     | 74          | 25.00 | -     | 25.00 | 25.00 | 25.00 | -     | -     |
|                     | 75          | 25.00 | -     | 25.00 | 25.00 | -     | 25.00 | -     |
|                     | 76          | 25.00 | -     | 25.00 | 25.00 | -     | -     | 25.00 |
|                     | 77          | 25.00 | -     | 25.00 | -     | 25.00 | 25.00 | -     |
|                     | 78          | 25.00 | -     | 25.00 | -     | 25.00 | -     | 25.00 |
|                     | 79          | 25.00 | -     | 25.00 | -     | -     | 25.00 | 25.00 |

| EOs of MAPs<br>used | Preparation | GO    | S     | R     | WC    | SO    | P     | L     |
|---------------------|-------------|-------|-------|-------|-------|-------|-------|-------|
|                     | 80          | 25.00 | -     | -     | 25.00 | 25.00 | 25.00 | -     |
|                     | 81          | 25.00 | -     | -     | 25.00 | 25.00 | -     | 25.00 |
|                     | 82          | 25.00 | -     | -     | 25.00 | -     | 25.00 | 25.00 |
|                     | 83          | 25.00 | -     | -     | -     | 25.00 | 25.00 | 25.00 |
|                     | 84          | -     | 25.00 | 25.00 | 25.00 | 25.00 | -     | -     |
|                     | 85          | -     | 25.00 | 25.00 | 25.00 | -     | 25.00 | -     |
|                     | 86          | -     | 25.00 | 25.00 | 25.00 | -     | -     | 25.00 |
|                     | 87          | -     | 25.00 | 25.00 | -     | 25.00 | 25.00 | -     |
|                     | 88          | -     | 25.00 | 25.00 | -     | 25.00 | -     | 25.00 |
|                     | 89          | -     | 25.00 | 25.00 | -     | -     | 25.00 | 25.00 |
|                     | 90          | -     | 25.00 | -     | 25.00 | 25.00 | 25.00 | -     |
|                     | 91          | -     | 25.00 | -     | 25.00 | 25.00 | -     | 25.00 |
|                     | 92          | -     | 25.00 | -     | 25.00 | -     | 25.00 | 25.00 |
|                     | 93          | -     | 25.00 | -     | -     | 25.00 | 25.00 | 25.00 |
|                     | 94          | -     | -     | 25.00 | 25.00 | 25.00 | 25.00 | -     |
|                     | 95          | -     | -     | 25.00 | 25.00 | 25.00 | -     | 25.00 |
|                     | 96          | -     | -     | 25.00 | 25.00 | -     | 25.00 | 25.00 |
|                     | 97          | -     | -     | 25.00 | -     | 25.00 | 25.00 | 25.00 |
|                     | 98          | -     | -     | -     | 25.00 | 25.00 | 25.00 | 25.00 |
| 5                   | 99          | 20.00 | 20.00 | 20.00 | 20.00 | 20.00 | -     | -     |
|                     | 100         | 20.00 | 20.00 | 20.00 | 20.00 | -     | 20.00 | -     |
|                     | 101         | 20.00 | 20.00 | 20.00 | 20.00 | -     | -     | 20.00 |
|                     | 102         | 20.00 | 20.00 | 20.00 | -     | 20.00 | 20.00 | -     |
|                     | 103         | 20.00 | 20.00 | 20.00 | -     | 20.00 | -     | 20.00 |
|                     | 104         | 20.00 | 20.00 | 20.00 | -     | -     | 20.00 | 20.00 |
|                     | 105         | 20.00 | 20.00 | -     | 20.00 | 20.00 | 20.00 | -     |
|                     | 106         | 20.00 | 20.00 | -     | 20.00 | 20.00 | -     | 20.00 |
|                     | 107         | 20.00 | 20.00 | -     | 20.00 | -     | 20.00 | 20.00 |
|                     | 108         | 20.00 | 20.00 | -     | -     | 20.00 | 20.00 | 20.00 |
|                     | 109         | 20.00 | -     | 20.00 | 20.00 | 20.00 | 20.00 | -     |
|                     | 110         | 20.00 | -     | 20.00 | 20.00 | 20.00 | -     | 20.00 |
|                     | 111         | 20.00 | -     | 20.00 | 20.00 | -     | 20.00 | 20.00 |
|                     | 112         | 20.00 | -     | 20.00 | -     | 20.00 | 20.00 | 20.00 |
|                     | 113         | 20.00 | -     | -     | 20.00 | 20.00 | 20.00 | 20.00 |
|                     | 114         | -     | 20.00 | 20.00 | 20.00 | 20.00 | 20.00 | -     |
|                     | 115         | -     | 20.00 | 20.00 | 20.00 | 20.00 | -     | 20.00 |
|                     | 116         | -     | 20.00 | 20.00 | 20.00 | -     | 20.00 | 20.00 |
|                     | 117         | -     | 20.00 | 20.00 | -     | 20.00 | 20.00 | 20.00 |
|                     | 118         | -     | 20.00 | -     | 20.00 | 20.00 | 20.00 | 20.00 |
|                     | 119         | -     | -     | 20.00 | 20.00 | 20.00 | 20.00 | 20.00 |
| 6                   | 120         | 16.67 | 16.67 | 16.67 | 16.67 | 16.67 | 16.67 | -     |
|                     | 121         | 16.67 | 16.67 | 16.67 | 16.67 | 16.67 | -     | 16.67 |
|                     | 122         | 16.67 | 16.67 | 16.67 | 16.67 | -     | 16.67 | 16.67 |

[illegible]
