# Supplementary material for: Antibacterial Effects of Essential Oils of Seven Medicinal-Aromatic Plants Against the Fish Pathogen Aeromonas veronii bv. sobria: To Blend or Not to Blend?
Source: MDPI journal article supplement (doi:10.3390/molecules26092731), 2021-05-06
Supplement: s1 [file s1]

**Supplementary material Table S1.** Main constituents and percentage content of essential oils (EOs) from seven Greek native medicinal-aromatic plants (MAPs) tested *in vitro* against *Aeromonas veronii* bv. *sobria*. **\*GO: Greek oregano; \*S: Savoury;** R: Rosemary; WC: Wild carrot; **\*SO: Spanish oregano;** P: Pennyroyal; L: Lemon balm (for the origin of the material see Table 4). The EOs content in bold from MAPs marked with asterisk (\*) were evaluated as highly effective single-note EOs against the studied fish pathogen (from Anastasiou et al. 2020 with modifications).

| No | Constituents          | *GO  | *S   | R    | WC   | *SO  | P    | L    |
|----|-----------------------|------|------|------|------|------|------|------|
| 1  | $\alpha$ -Thujene     |      | 2.5  |      |      | 3.5  |      |      |
| 2  | $\alpha$ -Pinene      |      | 1.8  | 8.8  | 20.5 | 1.6  |      |      |
| 3  | Camphene              |      |      | 4.0  | 1.1  |      |      |      |
| 4  | Sabinene              |      |      |      | 2.3  |      |      |      |
| 5  | $\beta$ -Pinene       |      | 1.0  | 7.6  |      |      |      |      |
| 6  | 1-Octen-3-ol          |      |      |      |      | 1.0  |      |      |
| 7  | Myrcene               | 1.2  | 2.9  | 1.1  | 6.9  | 4.6  |      |      |
| 8  | 3-Octanol             |      |      |      |      |      | 2.0  |      |
| 9  | $\alpha$ -Terpinene   |      | 3.5  |      |      | 3.9  |      |      |
| 10 | p-Cymene              | 9.6  | 6.5  | 1.4  |      | 11.9 |      |      |
| 11 | Sylvestrene           |      |      |      |      | 1.0  |      |      |
| 12 | Limonene              |      |      | 1.9  | 7.5  |      | 1.2  |      |
| 13 | Eucalyptol            |      |      | 45.0 |      |      |      |      |
| 14 | <i>trans</i> -Ocimene |      |      |      |      |      |      | 1.6  |
| 15 | $\gamma$ -Terpinene   | 5.3  | 34.0 |      |      | 20.5 |      |      |
| 16 | Linalool              |      | 1.4  |      |      | 1.1  |      |      |
| 17 | Camphor               |      |      | 11.5 |      |      |      |      |
| 18 | Citronellal           |      |      |      |      |      |      | 10.2 |
| 19 | Menthone              |      |      |      |      |      | 3.5  |      |
| 20 | Isomenthone           |      |      |      |      |      | 5.2  |      |
| 21 | Borneol               |      |      | 4.3  |      |      |      |      |
| 22 | Terpinen-4-ol         |      |      |      |      | 1.0  |      |      |
| 23 | $\alpha$ -Terpineol   |      |      | 1.9  |      |      |      |      |
| 24 | Citronellol           |      |      |      |      |      |      | 1.8  |
| 25 | Pulegone              |      |      |      |      |      | 47.6 |      |
| 26 | Neral                 |      |      |      |      |      |      | 6.5  |
| 27 | Carvacrolmethylether  |      | 1.8  |      |      |      |      |      |
| 28 | Piperitone            |      |      |      |      |      | 2.0  |      |
| 29 | Methylcitronellate    |      |      |      |      |      |      | 2.3  |
| 30 | Geranial              |      |      |      |      |      |      | 8.8  |
| 31 | Bornylacetate         |      |      | 1.9  |      |      |      |      |
| 32 | Thymol                | 2.1  |      |      |      |      |      |      |
| 33 | Carvacrol             | 72.0 | 32.8 |      |      | 42.0 |      |      |
| 34 | $\alpha$ -longipinene |      |      |      | 5.2  |      |      |      |
| 35 | Piperitenone          |      |      |      |      |      | 33.0 |      |
| 36 | $\alpha$ -Copaene     |      |      |      |      |      |      | 2.4  |
| 37 | $\beta$ -Bourbonene   |      |      |      |      |      |      | 1.5  |

| No | Constituents                       | *GO | *S  | R   | WC   | *SO | P | L    |
|----|------------------------------------|-----|-----|-----|------|-----|---|------|
| 38 | $\beta$ -Caryophyllene             |     | 6.9 | 3.7 |      | 3.4 |   | 27.7 |
| 39 | $\alpha$ -Caryophyllene            |     |     |     |      |     |   | 2.2  |
| 40 | <i>trans</i> - $\beta$ -Farnesene  |     |     |     |      |     |   | 1.2  |
| 41 | $\gamma$ -Muurolene                |     |     |     |      |     |   | 12.6 |
| 42 | $\alpha$ -Cedrene                  |     |     |     | 3.7  |     |   |      |
| 43 | Isoeugenol methyl ether            |     |     |     | 14.8 |     |   |      |
| 44 | $\alpha$ -( <i>E,E</i> )-Farnesene |     |     |     |      |     |   | 1.8  |
| 45 | $\gamma$ -Cadinene                 |     |     |     |      |     |   | 1.6  |
| 46 | $\delta$ -Cadinene                 |     |     |     |      |     |   | 2.9  |
| 47 | Caryophyllene oxide                |     |     |     |      |     |   | 2.7  |
| 48 | $\beta$ -Himachalene               |     |     |     | 21.6 |     |   |      |
| 49 | $\alpha$ -Cadinol                  |     |     |     |      |     |   | 1.0  |
